# Supplementary material
Source: publisher figshare collection journal article supplement (https://tandf.figshare.com/articles/dataset/_/3749394)
Supplement: Supplementary file 1 [file 1]

Archive with 13 entries (13 files):
- Table A1.pdf
- Table A10.pdf
- Table A11.pdf
- Table A12.pdf
- Table A13.pdf
- Table A2.pdf
- Table A3.pdf
- Table A4.pdf
- Table A5.pdf
- Table A6.pdf
- Table A7.pdf
- Table A8.pdf
- Table A9.pdf
