# Supplementary material
Source: publisher figshare collection journal article supplement (https://tandf.figshare.com/articles/dataset/_/3749394)
Supplement: Supplementary file 1 [file 1 › Table A1.pdf]

Table A1. Parametric variations of materials used for each layer of the External Wall Typology 1.

| <b>Layers of External Wall Typology 1</b><br><br>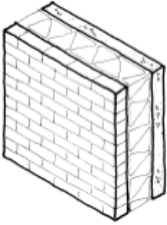 | <b>Number of variations</b> |
|------------------------------------------------------------------------------------------------------------------------------------|-----------------------------|
| <b>Internal layer: Heavyweight loadbearing</b>                                                                                     | <b>4</b>                    |
| 108 mm brickwork with mortar and render/paint finish                                                                               |                             |
| 100 mm lightweight concrete blocks with mortar and render/paint finish                                                             |                             |
| 180 mm lightweight concrete elements with steel reinforcement and paint finish                                                     |                             |
| 180 mm concrete with steel reinforcement and paint finish                                                                          |                             |
| <b>Insulating layer: Insulation &amp; ties (U-value: 0.15/0.12/0.09 W/m<sup>2</sup>K)</b>                                          | <b>3</b>                    |
| 250/300/400 mm mineral wool insulation with stainless steel ties                                                                   |                             |
| <b>External layer: Heavyweight finish</b>                                                                                          | <b>2</b>                    |
| 108 mm brickwork with mortar                                                                                                       |                             |
| 70 mm concrete with steel reinforcement to sandwich element                                                                        |                             |
| <b>Total number of parametric variations (4 x 3 x 2)</b>                                                                           | <b>24</b>                   |
