# Supplementary material
Source: publisher figshare collection journal article supplement (https://tandf.figshare.com/articles/dataset/_/3749394)
Supplement: Supplementary file 1 [file 1 › Table A2.pdf]

Table A2. Parametric variations of materials used for each layer of the External Wall Typology 2.

| <b>Layers of External Wall Typology 2</b><br><br>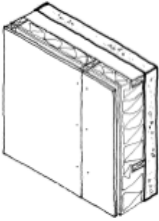 | <b>Number of variations</b> |
|------------------------------------------------------------------------------------------------------------------------------------|-----------------------------|
| <b>Internal layer: Heavyweight loadbearing</b>                                                                                     | <b>4</b>                    |
| 108 mm brickwork with mortar and render/paint finish                                                                               |                             |
| 100 mm lightweight concrete blocks with mortar and render/paint finish                                                             |                             |
| 180 mm lightweight concrete elements with steel reinforcement and paint finish                                                     |                             |
| 180 mm concrete with steel reinforcement and paint finish                                                                          |                             |
| <b>Insulating layer: Insulation &amp; framing (U-value: 0.15/0.12/0.09 W/m<sup>2</sup>K)</b>                                       | <b>12 + 3</b>               |
| 250/300/400 mm mineral wool insulation with C-post galvanised steel framing                                                        |                             |
| 275/325/425 mm cellulose insulation with C-post galvanised steel framing                                                           |                             |
| 250/300/400 mm mineral wool insulation with I-post timber framing                                                                  |                             |
| 275/325/425 mm cellulose insulation with I-post timber framing                                                                     |                             |
| 250/300/400 mm high density mineral wool insulation with stainless steel ties (only with 25 mm external render)                    |                             |
| <b>External layer: Lightweight finish</b>                                                                                          | <b>7 + 1</b>                |
| 25 mm pine timber cladding on timber battens on 8 mm fibre cement sheet                                                            |                             |
| 25 mm larch timber cladding on timber battens on 8 mm fibre cement sheet                                                           |                             |
| 10 mm fibre cement panel with finish on timber battens on 8 mm fibre cement sheet                                                  |                             |
| 30 mm natural stone on galvanised steel profiles on 8 mm fibre cement sheet                                                        |                             |
| 35 mm clay tile panel on galvanised steel profiles on 8 mm fibre cement sheet                                                      |                             |
| 1.5 mm aluminium sheet on galvanised steel profiles on 8 mm fibre cement sheet                                                     |                             |
| 1.0 mm zinc sheet on galvanised steel profiles on 8 mm fibre cement sheet                                                          |                             |
| 25 mm external render (only on high density mineral wool insulation with stainless steel ties)                                     |                             |
| <b>Total number of parametric variations (4 x 12 x 7) + (4 x 3 x 1)</b>                                                            | <b>348</b>                  |
