# Supplementary material
Source: publisher figshare collection journal article supplement (https://tandf.figshare.com/articles/dataset/_/3749394)
Supplement: Supplementary file 1 [file 1 › Table A3.pdf]

Table A3. Parametric variations of materials used for each layer of the External Wall Typology 3.

| <b>Layers of External Wall Typology 3</b><br><br>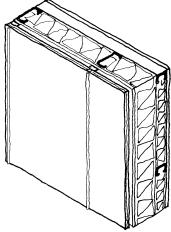 | <b>Number of variations</b> |
|------------------------------------------------------------------------------------------------------------------------------------|-----------------------------|
| <b>Internal layer: Lightweight finish</b>                                                                                          | <b>1</b>                    |
| 25 mm plasterboard with paint finish                                                                                               |                             |
| <b>Insulating layer: Loadbearing framing &amp; insulation (U-value: 0.15/0.12/0.09 W/m<sup>2</sup>K)</b>                           | <b>12</b>                   |
| C-post galvanised steel framing and cross-battens with polyethylene vapour barrier and 245/320/420 mm mineral wool insulation      |                             |
| C-post galvanised steel framing and cross-battens with polyethylene vapour barrier and 270/345/445 mm cellulose insulation         |                             |
| I-post timber framing and cross-battens with polyethylene vapour barrier and 245/320/420 mm mineral wool insulation                |                             |
| I-post timber framing and cross-battens with polyethylene vapour barrier and 270/345/445 mm cellulose insulation                   |                             |
| <b>External layer: Lightweight finish</b>                                                                                          | <b>7</b>                    |
| 25 mm pine timber cladding on timber battens on 8 mm fibre cement sheet                                                            |                             |
| 25 mm larch timber cladding on timber battens on 8 mm fibre cement sheet                                                           |                             |
| 10 mm fibre cement panel with finish on timber battens on 8 mm fibre cement sheet                                                  |                             |
| 30 mm natural stone on galvanised steel profiles on 8 mm fibre cement sheet                                                        |                             |
| 35 mm clay tile panel on galvanised steel profiles on 8 mm fibre cement sheet                                                      |                             |
| 1.5 mm aluminium sheet on galvanised steel profiles on 8 mm fibre cement sheet                                                     |                             |
| 1.0 mm zinc sheet on galvanised steel profiles on 8 mm fibre cement sheet                                                          |                             |
| <b>Total number of parametric variations (1 x 12 x 7)</b>                                                                          | <b>84</b>                   |
