# Supplementary material
Source: publisher figshare collection journal article supplement (https://tandf.figshare.com/articles/dataset/_/3749394)
Supplement: Supplementary file 1 [file 1 › Table A4.pdf]

Table A4. Parametric variations of materials used for each layer of the Roof Typology 1.

| <b>Layers of Roof Typology 1</b><br><br>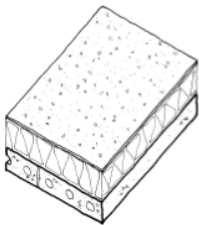 | <b>Number of variations</b> |
|---------------------------------------------------------------------------------------------------------------------------|-----------------------------|
| <b>Internal layer: Heavyweight loadbearing</b>                                                                            | <b>3</b>                    |
| 220 mm hollow pre-stressed concrete deck with render/paint finish                                                         |                             |
| 220 mm hollow pre-stressed concrete deck with suspended ceiling                                                           |                             |
| 205 mm galvanized steel trapeze deck with suspended ceiling                                                               |                             |
| <b>Insulating layer: Insulation (U-value: 0.12/0.09/0.07 W/m<sup>2</sup>K)</b>                                            | <b>6</b>                    |
| 300/400/500 mm high density mineral wool insulation                                                                       |                             |
| 300/400/500 mm EPS insulation with mineral wool fire protection                                                           |                             |
| <b>External layer: Lightweight finish</b>                                                                                 | <b>4</b>                    |
| 2 layer bitumen roofing membrane                                                                                          |                             |
| 1 layer EPDM roofing membrane                                                                                             |                             |
| Green roof with EPDM membrane and mineral wool insulation                                                                 |                             |
| 1.0 mm zinc sheet on separation layer                                                                                     |                             |
| <b>Total number of parametric variations (3 x 6 x 4)</b>                                                                  | <b>72</b>                   |
