# Supplementary material
Source: publisher figshare collection journal article supplement (https://tandf.figshare.com/articles/dataset/_/3749394)
Supplement: Supplementary file 1 [file 1 › Table A5.pdf]

Table A5. Parametric variations of materials used for each layer of the Roof Typology 2.

| <b>Layers of Roof Typology 2</b><br><br>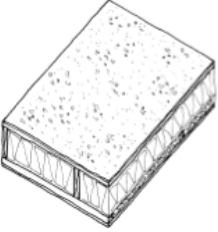 | <b>Number of variations</b> |
|---------------------------------------------------------------------------------------------------------------------------|-----------------------------|
| <b>Internal layer: Lightweight finish</b>                                                                                 | <b>2</b>                    |
| Suspended ceiling                                                                                                         |                             |
| 25 mm plasterboard with paint finish on timber battens                                                                    |                             |
| <b>Insulating layer: Loadbearing framing &amp; insulation (U-value: 0.12/0.09/0.07 W/m<sup>2</sup>K)</b>                  | <b>6</b>                    |
| Galvanised steel cassette with polyethylene vapour barrier and 275/350/450 mm mineral wool insulation                     |                             |
| I-post timber framing cassette with plywood panel, polyethylene vapour barrier and 275/350/450 mm mineral wool insulation |                             |
| <b>External layer: Lightweight finish</b>                                                                                 | <b>5</b>                    |
| 2 layer bitumen roofing membrane                                                                                          |                             |
| 1 layer EPDM roofing membrane                                                                                             |                             |
| Green roof with EPDM membrane and mineral wool insulation                                                                 |                             |
| 1.0 mm zinc sheet on separation layer                                                                                     |                             |
| Clay roof tiles with battens, cross-battens and sarking felt                                                              |                             |
| <b>Total number of parametric variations (2 x 6 x 5)</b>                                                                  | <b>60</b>                   |
