# Supplementary material
Source: publisher figshare collection journal article supplement (https://tandf.figshare.com/articles/dataset/_/3749394)
Supplement: Supplementary file 1 [file 1 › Table A6.pdf]

Table A6. Parametric variations of materials used for each layer of the Roof Typology 3.

| <b>Layers of Roof Typology 3</b><br><br>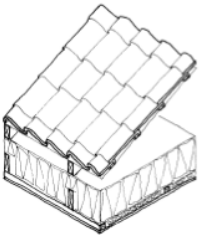 | <b>Number of variations</b> |
|---------------------------------------------------------------------------------------------------------------------------|-----------------------------|
| <b>Internal layer: Lightweight finish</b>                                                                                 | <b>1</b>                    |
| 13 mm plasterboard with paint finish on timber battens                                                                    |                             |
| <b>Insulating layer: Loadbearing framing &amp; cavity/insulation (U-value: 0.12/0.09/0.07 W/m<sup>2</sup>K)</b>           | <b>6</b>                    |
| Ventilated timber roof truss with polyethylene vapour barrier and 275/350/450 mm mineral wool insulation                  |                             |
| Ventilated timber roof truss with polyethylene vapour barrier and 325/450/550 mm cellulose insulation                     |                             |
| <b>External layer: Lightweight finish</b>                                                                                 | <b>2</b>                    |
| Clay roof tiles at 23° slope with battens, cross-battens and sarking felt                                                 |                             |
| Clay roof tiles at 45° slope with battens, cross-battens and sarking felt                                                 |                             |
| <b>Total number of parametric variations (1 x 6 x 2)</b>                                                                  | <b>12</b>                   |
