# Supplementary material
Source: publisher figshare collection journal article supplement (https://tandf.figshare.com/articles/dataset/_/3749394)
Supplement: Supplementary file 1 [file 1 › Table A7.pdf]

Table A7. Parametric variations of materials used for each layer of the Window/rooflight Typology 1.

| <b>Layers of Window/rooflight Typology 1</b><br><br>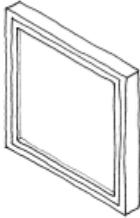 | <b>Number of variations</b> |
|---------------------------------------------------------------------------------------------------------------------------------------|-----------------------------|
| <b>Frame</b>                                                                                                                          | <b>5</b>                    |
| Timber window                                                                                                                         |                             |
| Timber/composite window                                                                                                               |                             |
| Aluminium curtainwall system                                                                                                          |                             |
| Timber/aluminium rooflight                                                                                                            |                             |
| Aluminium roofing system                                                                                                              |                             |
| <b>Glazing (single glazing/double glazing/ triple glazing)</b>                                                                        | <b>6</b>                    |
| 4mm float glass to glazing units                                                                                                      |                             |
| 6mm float glass to glazing units                                                                                                      |                             |
| <b>Total number of parametric variations (5 x 4)</b>                                                                                  | <b>30</b>                   |
