# Supplementary material
Source: publisher figshare collection journal article supplement (https://tandf.figshare.com/articles/dataset/_/3749394)
Supplement: Supplementary file 1 [file 1 › Table A8.pdf]

Table A8. Parametric variations of materials used for each layer of the Ground Floor Typology 1.

| <b>Layers of Ground Floor Typology 1</b><br><br>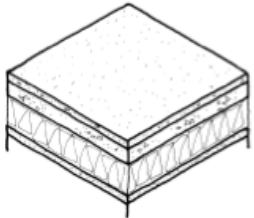 | <b>Number of variations</b> |
|-----------------------------------------------------------------------------------------------------------------------------------|-----------------------------|
| <b>Internal layer: Heavy/lightweight finish</b>                                                                                   | <b>6</b>                    |
| 40 mm finished cement screed                                                                                                      |                             |
| Linoleum on 30 mm cement screed                                                                                                   |                             |
| Carpet tiles on 30 mm cement screed                                                                                               |                             |
| 30 mm natural stone with mortar                                                                                                   |                             |
| 22 mm clay tiles with mortar                                                                                                      |                             |
| 15 mm timber flooring with acoustic insulation                                                                                    |                             |
| <b>Middle layer: Heavyweight loadbearing</b>                                                                                      | <b>1</b>                    |
| 100 mm concrete with steel reinforcement on moisture barrier                                                                      |                             |
| <b>External layer: Insulation on terrain (U-value: 0.12/0.09/0.07 W/m<sup>2</sup>K)</b>                                           | <b>3</b>                    |
| 300/400/500 mm EPS insulation on 150 mm gravel                                                                                    |                             |
| <b>Total number of parametric variations (6 x 1 x 3)</b>                                                                          | <b>18</b>                   |
