# Supplementary material
Source: publisher figshare collection journal article supplement (https://tandf.figshare.com/articles/dataset/_/3749394)
Supplement: Supplementary file 1 [file 1 › Table A9.pdf]

Table A9. Parametric variations of materials used for Foundations Typology 1.

| <b>Foundations Typology 1</b><br>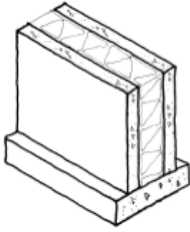 | <b>Number of variations</b> |
|--------------------------------------------------------------------------------------------------------------------|-----------------------------|
| <b>Foundations to external walls (U-value: 0.15/0.12/0.09 W/m<sup>2</sup>K)</b>                                    | <b>15</b>                   |
| Insulated foundations to External Wall Typology 1 with 100-108 mm inner leaf                                       |                             |
| Insulated foundations to External Wall Typology 1 with 180 mm inner leaf                                           |                             |
| Insulated foundations to External Wall Typology 2 with 100-108 mm inner leaf                                       |                             |
| Insulated foundations to External Wall Typology 2 with 180 mm inner leaf                                           |                             |
| Insulated foundations to External Wall Typology 3                                                                  |                             |
| <b>Foundations to internal walls (3 thickness variations)</b>                                                      | <b>3</b>                    |
| Foundations to Internal Wall Typology 1 with 100/150/200 mm thickness                                              |                             |
| <b>Total number of parametric variations (15 + 3)</b>                                                              | <b>18</b>                   |
