# Supplementary material
Source: publisher figshare collection journal article supplement (https://tandf.figshare.com/articles/dataset/_/3749394)
Supplement: Supplementary file 1 [file 1 › Table A10.pdf]

Table A10. Parametric variations of materials used for each layer of the Internal Wall Typology 1.

| <b>Layers of Internal Wall Typology 1</b><br><br>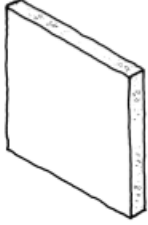 | <b>Number of variations</b> |
|------------------------------------------------------------------------------------------------------------------------------------|-----------------------------|
| <b>Surface layer: Finish</b>                                                                                                       | <b>1</b>                    |
| Render and paint finish                                                                                                            |                             |
| <b>Middle layer: Heavyweight (3 thickness variations)</b>                                                                          | <b>12</b>                   |
| 108/162/216 mm brickwork with mortar                                                                                               |                             |
| 100/150/200 mm lightweight concrete blocks with mortar                                                                             |                             |
| 100/150/200 mm lightweight concrete elements with steel reinforcement                                                              |                             |
| 100/150/200 mm concrete with steel reinforcement                                                                                   |                             |
| <b>Surface layer: Finish</b>                                                                                                       | <b>1</b>                    |
| Render and paint finish                                                                                                            |                             |
| <b>Total number of parametric variations (4 x 3 x 2)</b>                                                                           | <b>12</b>                   |
