# Supplementary material
Source: publisher figshare collection journal article supplement (https://tandf.figshare.com/articles/dataset/_/3749394)
Supplement: Supplementary file 1 [file 1 › Table A11.pdf]

Table A11. Parametric variations of materials used for each layer of the Internal Wall Typology 2.

| <b>Layers of Internal Wall Typology 2</b><br><br>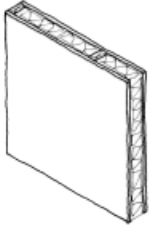 | <b>Number of variations</b> |
|------------------------------------------------------------------------------------------------------------------------------------|-----------------------------|
| <b>Surface layer: Finish</b>                                                                                                       | <b>2</b>                    |
| 13 mm plasterboard with paint finish                                                                                               |                             |
| 25 mm plasterboard with paint finish                                                                                               |                             |
| <b>Middle layer: Framing &amp; insulation (3 thickness variations)</b>                                                             | <b>12</b>                   |
| C-post galvanised steel framing and cross-battens with 80/120/160 mm mineral wool insulation                                       |                             |
| C-post galvanised steel framing and cross-battens with 80/120/160 mm cellulose insulation                                          |                             |
| I-post timber framing and cross-battens with 80/120/160 mm mineral wool insulation                                                 |                             |
| I-post timber framing and cross-battens with 80/120/160 mm cellulose insulation                                                    |                             |
| <b>Surface layer: Finish</b>                                                                                                       | <b>2</b>                    |
| Same as other surface layer                                                                                                        |                             |
| <b>Total number of parametric variations (2 x 12 x 1)</b>                                                                          | <b>24</b>                   |
