# Supplementary material
Source: publisher figshare collection journal article supplement (https://tandf.figshare.com/articles/dataset/_/3749394)
Supplement: Supplementary file 1 [file 1 › Table A12.pdf]

Table A12. Parametric variations of materials used for each layer of the Internal Floor Typology 1.

| <b>Layers of Internal Floor Typology 1</b><br><br>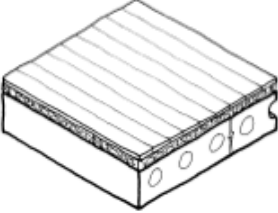 | <b>Number of variations</b> |
|-------------------------------------------------------------------------------------------------------------------------------------|-----------------------------|
| <b>Surface layer: Floor finish</b>                                                                                                  | <b>6</b>                    |
| 40 mm finished cement screed                                                                                                        |                             |
| Linoleum on 30 mm cement screed                                                                                                     |                             |
| Carpet tiles on 30 mm cement screed                                                                                                 |                             |
| 30 mm natural stone with mortar                                                                                                     |                             |
| 22 mm clay tiles with mortar                                                                                                        |                             |
| 15 mm timber flooring with acoustic insulation                                                                                      |                             |
| <b>Middle layer: Heavyweight (3 depth variations)</b>                                                                               | <b>3</b>                    |
| 200/300/400 mm hollow pre-stressed concrete deck                                                                                    |                             |
| <b>Surface layer: Finish</b>                                                                                                        | <b>2</b>                    |
| Render/paint finish                                                                                                                 |                             |
| Suspended ceiling                                                                                                                   |                             |
| <b>Total number of parametric variations (6 x 3 x 2)</b>                                                                            | <b>36</b>                   |
