# Supplementary material
Source: publisher figshare collection journal article supplement (https://tandf.figshare.com/articles/dataset/_/3749394)
Supplement: Supplementary file 1 [file 1 › Table A13.pdf]

Table A13. Parametric variations of materials used for each layer of the Internal Floor Typology 2.

| <b>Layers of Internal Floor Typology 2</b><br><br>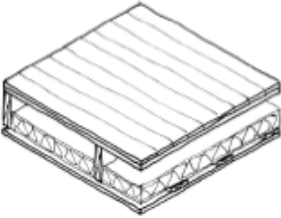 | <b>Number of variations</b> |
|-------------------------------------------------------------------------------------------------------------------------------------|-----------------------------|
| <b>Surface layer: Floor finish</b>                                                                                                  | <b>3</b>                    |
| Linoleum                                                                                                                            |                             |
| Carpet tiles                                                                                                                        |                             |
| 15 mm timber flooring with acoustic insulation                                                                                      |                             |
| <b>Middle layer: Framing &amp; insulation (3 depth variations)</b>                                                                  | <b>9</b>                    |
| Galvanised steel cassette with 200/300/350 mm mineral wool insulation                                                               |                             |
| I-post timber framing cassette with plywood panel and 200/300/400 mm mineral wool insulation                                        |                             |
| I-post timber framing cassette with plywood panel and 200/300/400 mm cellulose insulation                                           |                             |
| <b>Surface layer: Finish</b>                                                                                                        | <b>2</b>                    |
| 25 mm plasterboard with paint finish                                                                                                |                             |
| Suspended ceiling                                                                                                                   |                             |
| <b>Total number of parametric variations (3 x 9 x 2)</b>                                                                            | <b>54</b>                   |
